# Supplementary material for: Microwave-assisted solvothermal synthesis and growth mechanism of WO3·(H2O)0.33hierarchical microstructures
Source: Royal Society of Chemistry journal article supplement (doi:10.1039/b915363b), 2009-12-02
Supplement: b915363b.pdf [file b915363b.pdf]

## Supporting Information

### Microwave-assisted solvothermal synthesis and growth mechanism of $\text{WO}_3 \cdot (\text{H}_2\text{O})_{0.33}$ hierarchical microstructures

Ying-Li Ma,<sup>a</sup> Lei Zhang,<sup>a</sup> Xiao-Feng Cao,<sup>a</sup> Xue-Tai Chen<sup>\*a</sup> and Zi-Ling Xue<sup>b</sup>

<sup>a</sup>State Key Laboratory of Coordination Chemistry, Nanjing National Laboratory of Microstructures, School of

Chemistry and Chemical Engineering, Nanjing University, Nanjing 210093, P. R. China. Fax: +86-25-83314502.

E-mail: [xtchen@netra.nju.edu.cn](mailto:xtchen@netra.nju.edu.cn)

<sup>b</sup>Department of Chemistry, The University of Tennessee, Knoxville, Tennessee 37996-1600, USA.

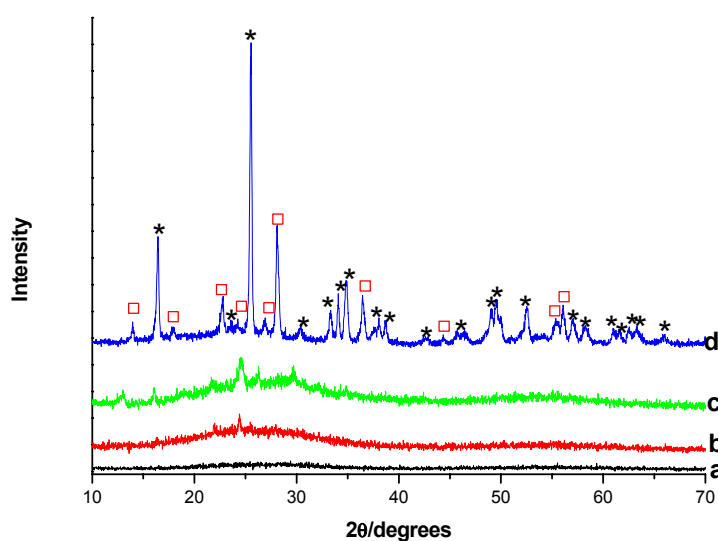

**Fig. S1** XRD patterns of the as-prepared products at 150 °C when 0.279g  $\text{Na}_2\text{H}_2\text{EDTA}$ , 5ml glycerol and 1ml HCl

was added with different reaction times: (a) 1 min, (b) 2 min, (c) 3 min and (d) 4 min. ◻:  $\text{WO}_3 \cdot (\text{H}_2\text{O})_{0.33}$  and

\*:  $\text{WO}_3 \cdot \text{H}_2\text{O}$ .

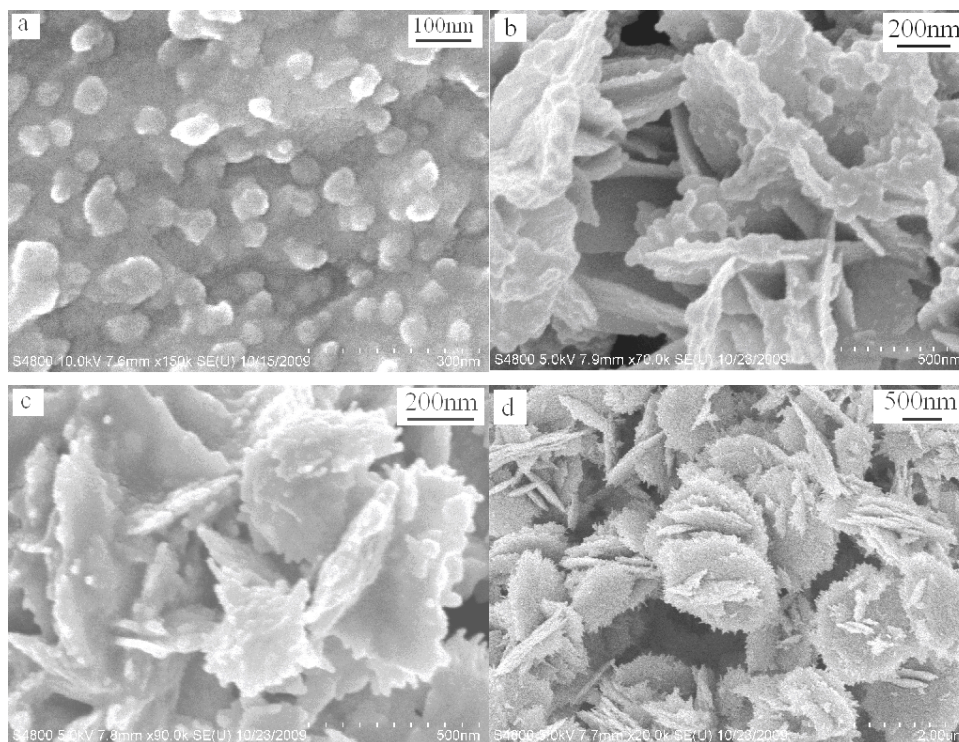

**Fig. S2** SEM images of the as-prepared products at 150 °C when 0.279 g  $\text{Na}_2\text{H}_2\text{EDTA}$ , 5 ml glycerol and 1ml HCl was added with different reaction times: (a) 1 min, (b) 2 min, (c) 3 min and (d) 4 min.

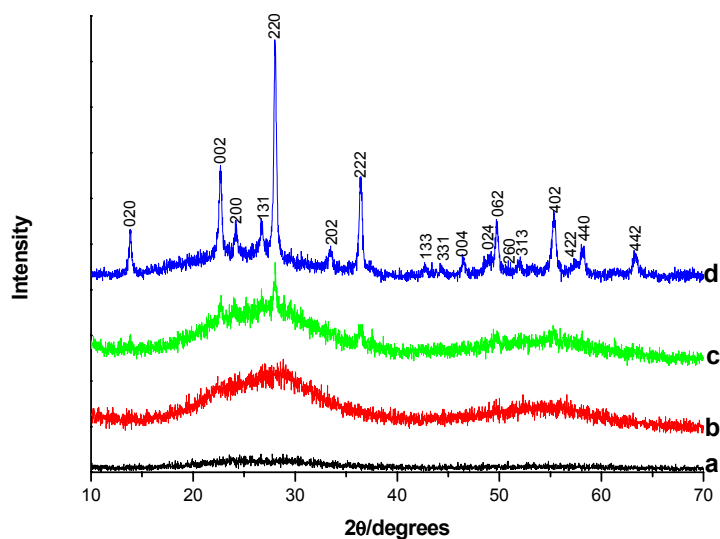

**Fig. S3** XRD patterns of the as-prepared products at 150 °C when 1ml glycerol, 0.1861g  $\text{Na}_2\text{H}_2\text{EDTA}$  and 1ml HCl was added with different reaction times: (a) 5 s, (b) 15 s, (c) 1 min and (d) 3 min.

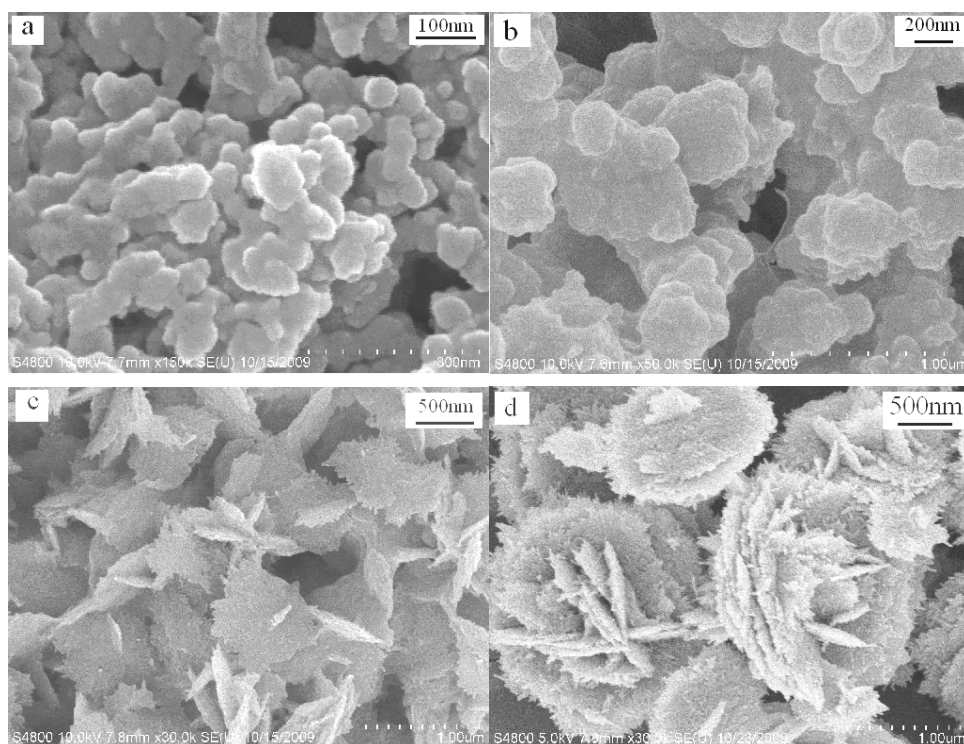

**Fig. S4** SEM images of the as-prepared products at 150 °C when 1ml glycerol, 0.1861g Na<sub>2</sub>H<sub>2</sub>EDTA and 1ml HCl was added with different reaction times: (a) 5 s, (b) 15 s, (c) 1 min and (d) 3 min.
